# Supplementary material for: A fermented Mistletoe (Viscum album L.) extract elicits markers characteristic for immunogenic cell death driven by endoplasmic reticulum stress in vitro
Source: Springer Nature journal article supplement (doi:10.1186/s12906-025-04909-8), 2025-05-14
Supplement: MOESM1 [file 12906_2025_4909_MOESM1_ESM.pdf]

**A Fermented Mistletoe (*Viscum album* L.) Extract Elicits markers characteristic for  
Immunogenic Cell Death Driven by Endoplasmic Reticulum Stress *in vitro***

**Ulrike Weissenstein<sup>1\*</sup>, Sibylle Tschumi<sup>1</sup>, Bettina Leonhard<sup>1</sup>, Stephan Baumgartner<sup>1,2</sup>**

<sup>1</sup> Society for Cancer Research, Arlesheim, Switzerland

<sup>2</sup> Institute of Integrative Medicine, Witten/Herdecke University, Herdecke, Germany

\* Corresponding Author

***Supplementary Material***

## Gating strategy for DAMP analysis

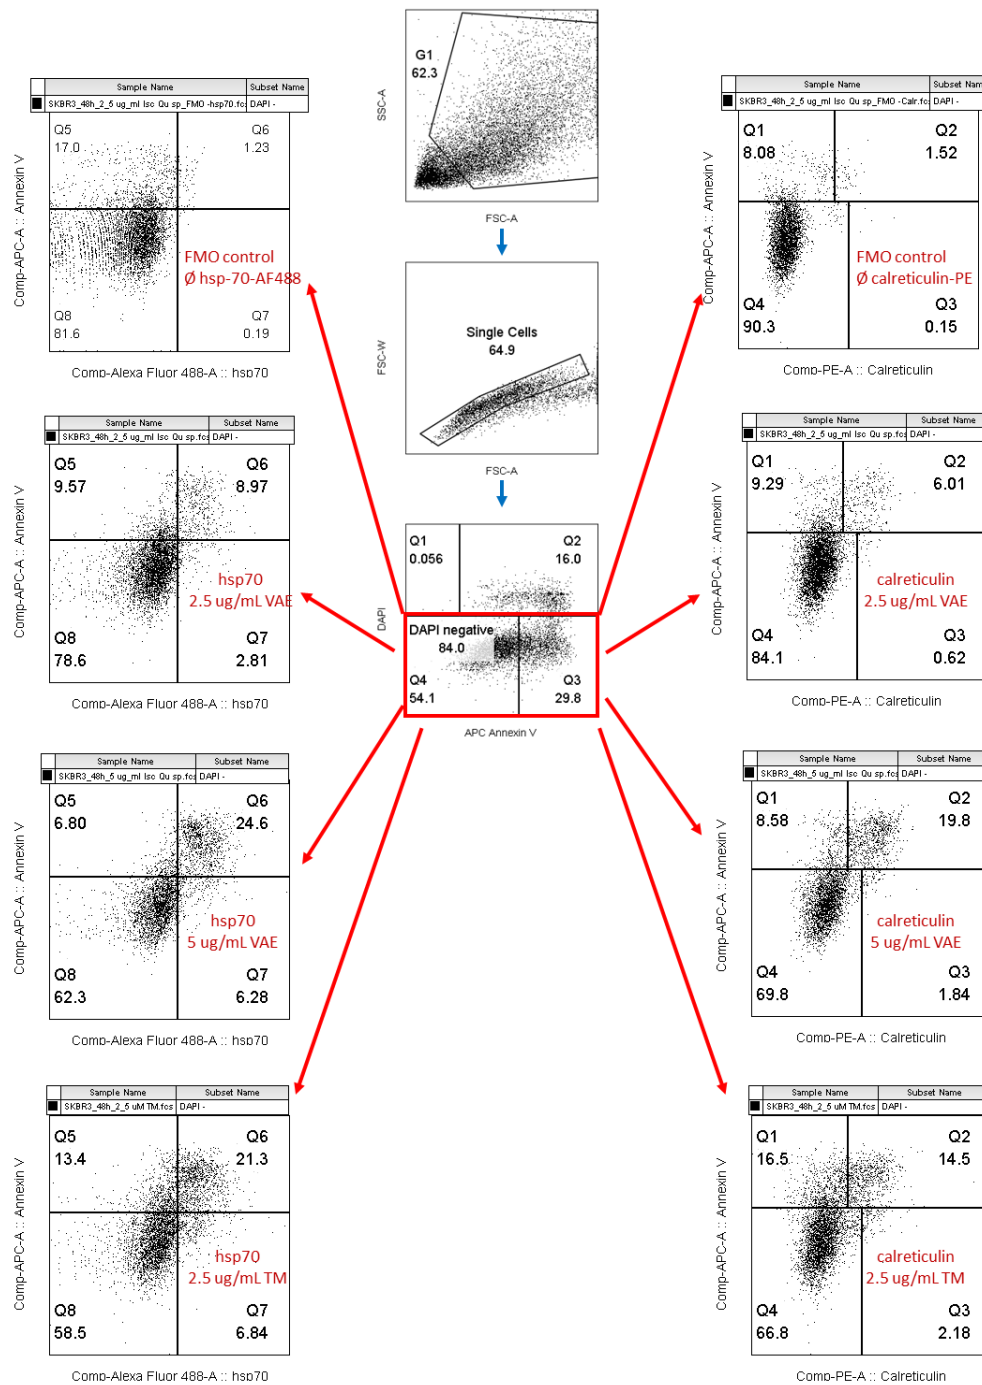

**Supplementary Figure 1.** Representative flow cytometry plots illustrating the gating strategy for FACS analysis of cancer cells. In the FSC/SSC dot blot, G1 encompasses the cancer cell population, single cells were further gated. Dapi negative cells were then analyzed for their expression of Annexin V and the respective DAMPs. Separation between DAMP-positive and DAMP-negative populations was performed using FMO (fluorescence minus one) controls.

Flow cytometry analysis of DAMP exposure

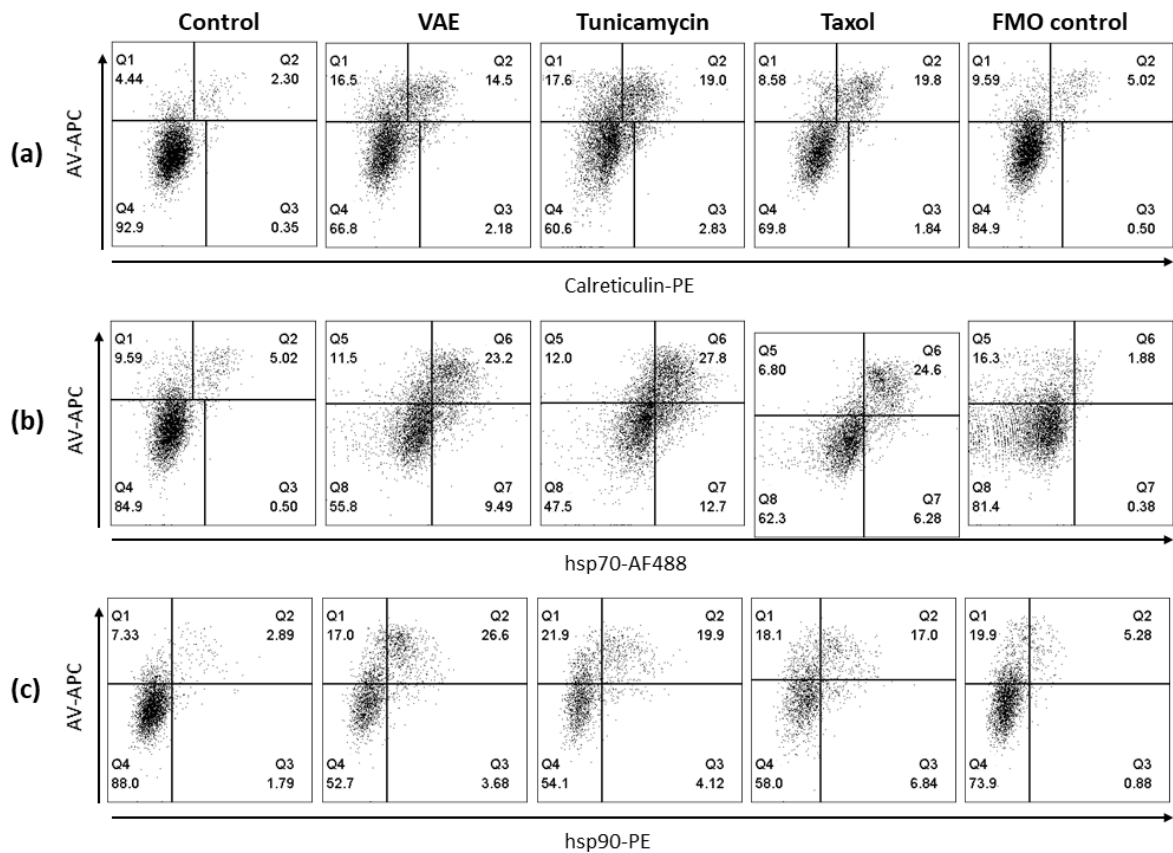

**Supplementary Figure 2.** Representative dot blots of the flow cytometry analysis of DAMP exposure on the surface of 7-AAD/DAPI-negative SKBR3 cells after 48h treatment with VAE, tunicamycin or Taxol compared to untreated control and FMO control. (a) Calreticulin, (b) hsp70 and (c) hsp90.

# **Spearman nonparametric correlation between early apoptosis and surface expositions of DAMPs**

**Supplementary Table 1:** Spearman nonparametric correlation between early apoptosis and surface expositions of DAMPs after 24h treatment (SKBR3 and B16F10) and 48h treatment (SKBR3, MDA-MB-231, MCF-7 and B16F10) with ICD inducing drugs

|                       |                                   | <b>AV+/DAPI-<br/>- vs. CAL+</b> | <b>AV+/DAPI-<br/>vs. hsp70+</b> | <b>AV+/DAPI-<br/>vs. hsp90+</b> |
|-----------------------|-----------------------------------|---------------------------------|---------------------------------|---------------------------------|
| <b>SKBR3 24h</b>      | Spearman r                        | 0.9429                          | 0.8857                          | 1.0                             |
|                       | P value (two-tailed)              | 0.0167                          | 0.0333                          | 0.0028                          |
|                       | Exact or approximate<br>P value   | Exact                           | Exact                           | Exact                           |
|                       | Significance level (alpha = 0.05) | Yes                             | Yes                             | Yes                             |
| <b>SKBR3 48h</b>      | Number of XY Pairs                | 6                               | 6                               | 6                               |
|                       | Spearman r                        | 1.000                           | 0.9429                          | 0.9429                          |
|                       | P value (two-tailed)              | 0.0028                          | 0.0167                          | 0.0167                          |
|                       | Exact or approximate<br>P value   | Exact                           | Exact                           | Exact                           |
|                       | Significance level (alpha = 0.05) | Yes                             | Yes                             | Yes                             |
|                       | Number of XY Pairs                | 6                               | 6                               | 6                               |
| <b>MDA-MB-231 48h</b> | Spearman r                        | 1.000                           | 0.9429                          | 0.9429                          |
|                       | P value (two-tailed)              | 0.0028                          | 0.0167                          | 0.0167                          |
|                       | Exact or approximate<br>P value   | Exact                           | Exact                           | Exact                           |
|                       | Significance level (alpha = 0.05) | Yes                             | Yes                             | Yes                             |
|                       | Number of XY Pairs                | 6                               | 6                               | 6                               |
| <b>MCF-7 48h</b>      | Spearman r                        | -0.2000                         | -0.2000                         | 0.2571                          |
|                       | P value (two-tailed)              | 0.7139                          | 0.7139                          | 0.6583                          |
|                       | Exact or approximate<br>P value   | Exact                           | Exact                           | Exact                           |
|                       | Significance level (alpha = 0.05) | No                              | No                              | No                              |
|                       | Number of XY Pairs                | 6                               | 6                               | 6                               |

|                   |                                   |        |        |        |
|-------------------|-----------------------------------|--------|--------|--------|
| <b>B16F10 24h</b> | Spearman r                        | 0.9429 | 0.8857 | 0.9429 |
|                   | P value (two-tailed)              | 0.0167 | 0.0333 | 0.0167 |
|                   | Exact or approximate<br>P value   | Exact  | Exact  | Exact  |
|                   | Significance level (alpha = 0.05) | Yes    | Yes    | Yes    |
|                   | Number of XY Pairs                | 6      | 6      | 6      |
| <b>B16F10 48h</b> | Spearman r                        | 1.000  | 0.8286 | 0.9429 |
|                   | P value (two-tailed)              | 0.0028 | 0.0583 | 0.0167 |
|                   | Exact or approximate<br>P value   | Exact  | Exact  | Exact  |
|                   | Significance level (alpha = 0.05) | Yes    | No     | Yes    |
|                   | Number of XY Pairs                | 6      | 6      | 6      |

### Correlation of Apoptosis and DAMP surface expression

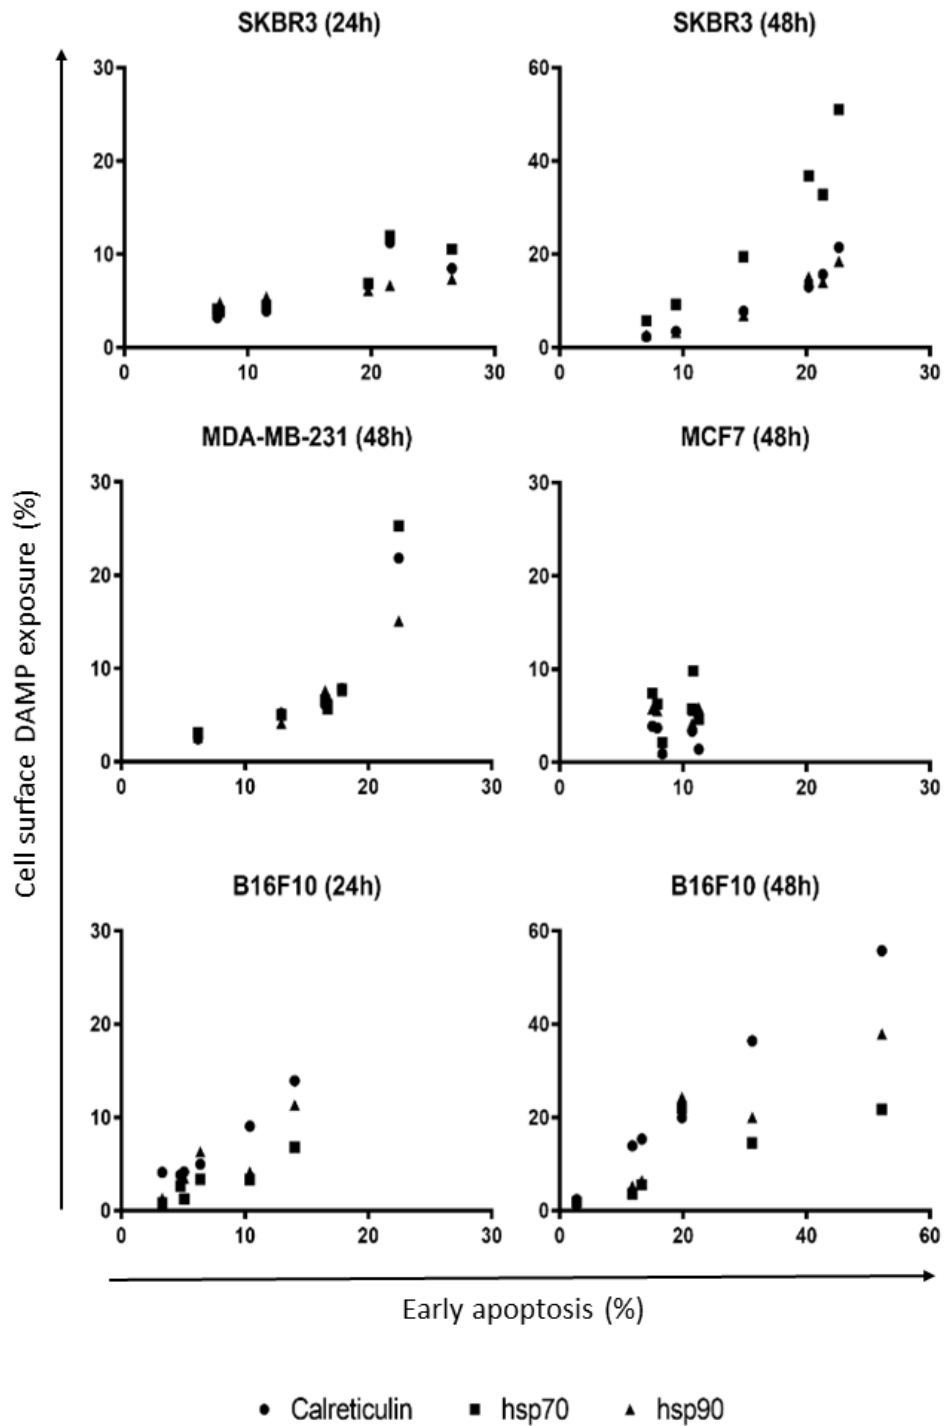

**Supplementary Figure 3.** Scatter plot of representative correlation between the cell surface DAMP exposure and early apoptosis detected in cancer cell lines

Flow cytometric analysis of apoptosis

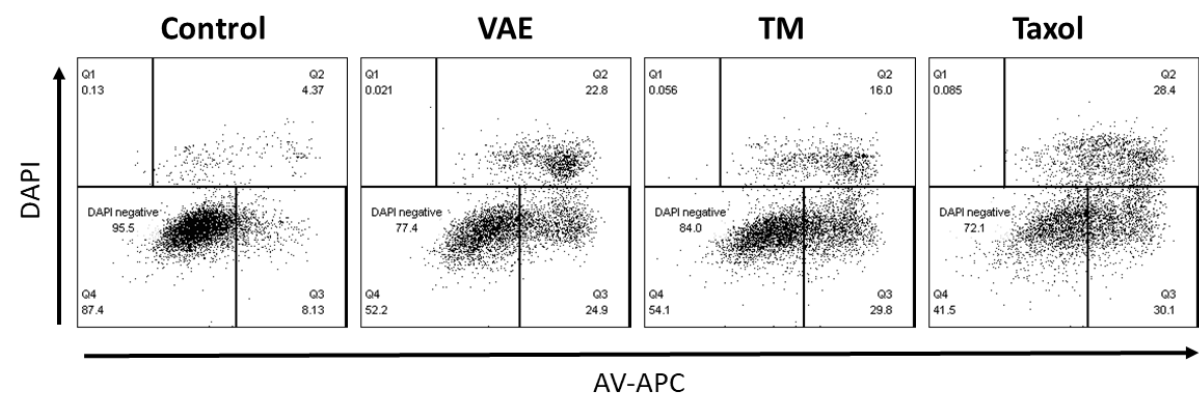

**Supplementary Figure 4.** Representative dot blots of flow cytometric analysis of apoptosis in SKBR3 cells treated for 48h with VAE, tunicamycin or Taxol compared to untreated control. Cells were labeled with Annexin V-APC and DAPI. The numbers in the graphs represent the percentages of cells in each quadrant. Q1 and Q2: late apoptotic/necrotic cells, Q3: early apoptotic cells, Q4: living cells. Cells in Q3 and Q4 were referred to as DAPI negative.

HMGB1 release by MDA-MB-231 cells

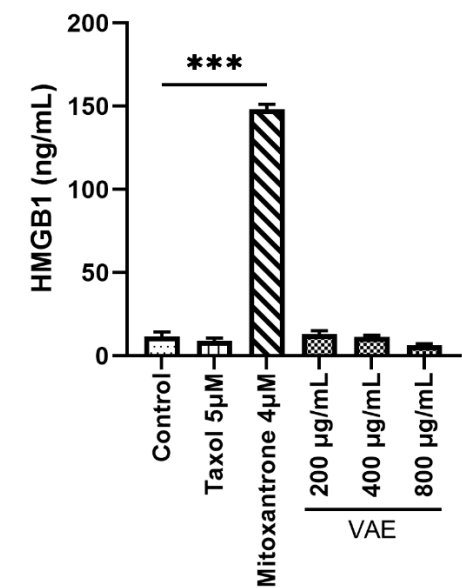

**Supplementary Figure 5.** HMGB1 release by MDA-MB-231 cells. Cells treated with indicated concentrations of Taxol, Mitoxantrone or VAE for 24h. Results are presented as mean  $\pm$  SE from at least 3 independent experiments. Significance values are given relative to the untreated control (\*\*\*) $p < 0.001$ .
